# Supplementary material for: Ln3+-mediated formation of luminescent ionogels
Source: Royal Society of Chemistry journal article supplement (doi:10.1039/c2tc00625a), 2012-12-21
Supplement: c2tc00625a.pdf [file c2tc00625a.pdf]

Supporting information

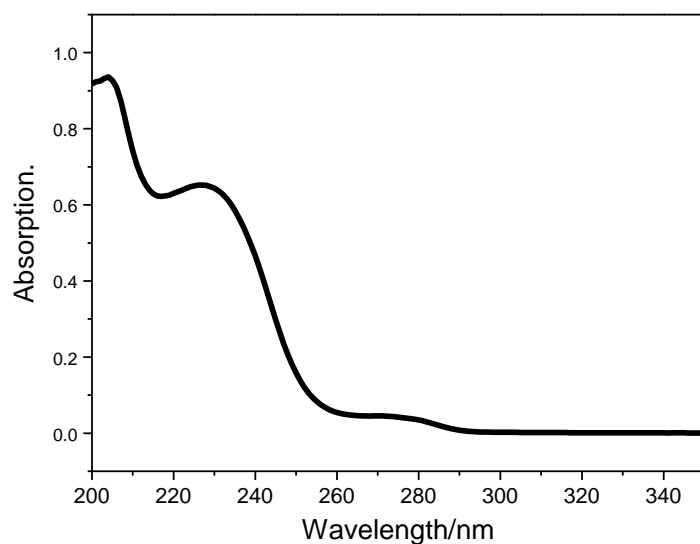

Figure S1. absorption spectrum of IL-ACC in EtOH ( $1.2 \times 10^{-5} \text{ M}$ )

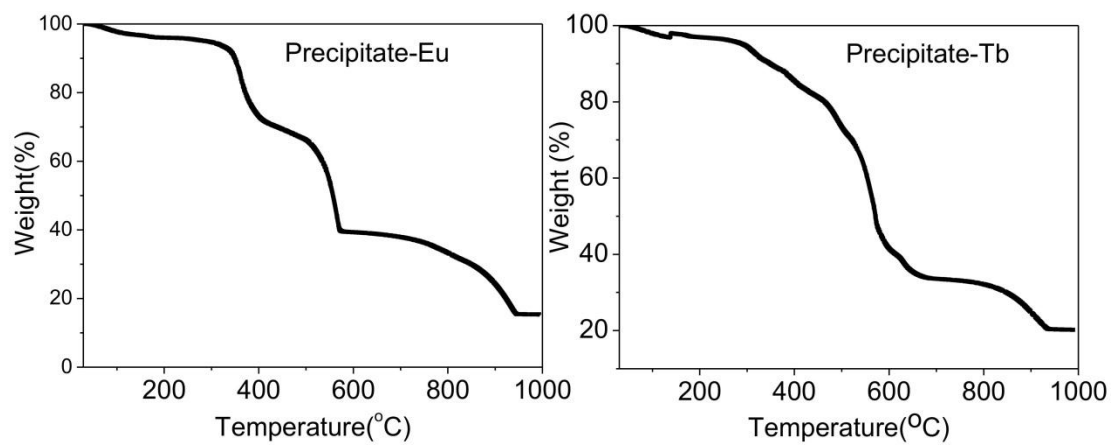

Figure S2. TGA curves of the complexes
